# Supplementary material
Source: PubMed Central journal article supplement (PMC2959140)
Supplement: NIHMS237095-supplement-Supp1.pdf [file NIHMS237095-supplement-Supp1.pdf]

**Supplementary Information: Relations of Biomarkers of Extracellular Matrix Remodeling to Incident Cardiovascular Events and Mortality**

- I. Definitions of covariates**
- II. Supplementary Table I. Results in referent group**
- III. Supplementary Table II. Results in remodeled group**

## **Definitions of Covariates**

We defined all covariates at examination cycle 6, which served as the baseline for the present investigation. We calculated body mass index (BMI) as the weight in kilograms divided by the square of height in meters. A physician measured blood pressure twice during the Heart Study clinic visit on the left arm of seated participants using a mercury-column sphygmomanometer and a cuff of appropriate size; we used the average of these two readings as the examination blood pressure. We defined diabetes as fasting plasma glucose of 126 mg/dl or greater, or the use of insulin or other hypoglycemic therapy. We defined “current smoking” as smoking on average at least one cigarette per day in the year preceding the baseline examination.

**Supplementary Table I. Relations of ECM biomarkers to CVD and mortality – Referent Group**

|                                                                             | CVD                 |                 | Death              |                 |
|-----------------------------------------------------------------------------|---------------------|-----------------|--------------------|-----------------|
|                                                                             | Adjusted HR (CI)    | <i>P</i> -value | Adjusted HR (CI)   | <i>P</i> -value |
| <b>A. MMP-9 as binary covariate (n = 271; 12 CVD events and 9 deaths) *</b> |                     |                 |                    |                 |
| Age- and sex-adjusted                                                       | 3.52 (1.03 – 12.10) | 0.045           | 0.0 (0.0)          | 0.99            |
| Multivariable-adjusted                                                      | 4.29 (1.02 – 18.00) | 0.047           | 0.0 (0.0)          | 0.99            |
| <b>B. log-TIMP-1 (n = 572; 26 CVD events and 17 deaths) †</b>               |                     |                 |                    |                 |
| Age- and sex-adjusted                                                       | 1.10 (0.72 – 1.69)  | 0.65            | 2.52 (1.49 – 4.27) | 0.0006          |
| Multivariable-adjusted                                                      | 1.09 (0.75 – 1.60)  | 0.64            | 2.33 (1.35 – 4.00) | 0.002           |
| <b>C. log-PIIINP (n = 512; 24 CVD events and 15 deaths) †</b>               |                     |                 |                    |                 |
| Age- and sex-adjusted                                                       | 1.09 (0.73 – 1.64)  | 0.67            | 1.54 (1.04 – 2.27) | 0.03            |
| Multivariable-adjusted                                                      | 1.06 (0.68 – 1.66)  | 0.81            | 1.56 (1.02 – 2.37) | 0.04            |

Multivariable model included age, sex, BMI, systolic blood pressure, hypertension treatment, diabetes, total cholesterol/high density lipoprotein cholesterol ratio, current smoking and LV mass (continuous variable).

\* HR indicates hazards in those with detectable MMP-9 compared to those without.

† HR per standard deviation change in biomarker levels.

**Supplementary Table II. Relations of ECM biomarkers to CVD and mortality – Remodeled Group**

|                                                                              | CVD                |                 | Death              |                 |
|------------------------------------------------------------------------------|--------------------|-----------------|--------------------|-----------------|
|                                                                              | Adjusted HR (CI)   | <i>P</i> -value | Adjusted HR (CI)   | <i>P</i> -value |
| <b>A. MMP-9 as binary covariate (n = 335; 52 CVD events and 32 deaths) *</b> |                    |                 |                    |                 |
| Age- and sex-adjusted                                                        | 1.13 (0.61 – 2.09) | 0.71            | 1.42 (0.67 – 2.98) | 0.84            |
| Multivariable-adjusted                                                       | 0.95 (0.50 – 1.80) | 0.87            | 1.10 (0.50 – 2.38) | 0.82            |
| <b>B. log-TIMP-1 (n = 350; 55 CVD events and 34 deaths) †</b>                |                    |                 |                    |                 |
| Age- and sex-adjusted                                                        | 1.38 (1.07 – 1.77) | 0.01            | 1.73 (1.29 – 2.32) | 0.0003          |
| Multivariable-adjusted                                                       | 1.11 (0.84 – 1.47) | 0.45            | 1.64 (1.16 – 2.30) | 0.005           |
| <b>C. log-PIIINP (n = 323; 50 CVD events and 31 deaths) †</b>                |                    |                 |                    |                 |
| Age- and sex-adjusted                                                        | 1.52 (1.16 – 1.99) | 0.003           | 1.50 (1.01 – 2.23) | 0.04            |
| Multivariable-adjusted                                                       | 1.50 (1.09 – 2.06) | 0.01            | 1.80 (1.23 – 2.70) | 0.003           |

Multivariable model included age, sex, BMI, systolic blood pressure, hypertension treatment, diabetes, total cholesterol/high density lipoprotein cholesterol ratio, current smoking and LV mass (continuous variable).

\* HR indicates hazards in those with detectable MMP-9 compared to those without.

† HR per standard deviation change in biomarker levels.
